# Supplementary material for: Prioritization of potential vaccine targets using comparative proteomics and designing of the chimeric multi-epitope vaccine against Pseudomonas aeruginosa
Source: PubMed Central journal article supplement (PMC6437148; doi:10.1038/s41598-019-41496-4), 2019-03-27
Supplement: 41598_2019_41496_MOESM1_ESM.pdf [file 41598_2019_41496_MOESM1_ESM.pdf]

## **Supplementary Tables and Supplementary Figures**

**Title: Prioritization of potential vaccine targets using comparative proteomics and designing of the chimeric multi-epitope vaccine against *Pseudomonas aeruginosa***

Authors: Vandana Solanki, Monalisa Tiwari, and Vishvanath Tiwari\*

**Supplementary Table ST-1: Finalized shortlisted non-redundant strains of *P. aeruginosa***

| <b>S.No.</b> | <b><i>P. aeruginosa</i> strains</b>                          | <b>Uniport ID</b> |
|--------------|--------------------------------------------------------------|-------------------|
| 1            | <i>P. aeruginosa</i> ATCC 15692/PAO1<br>(Reference proteome) | UP000002438       |
| 2            | <i>P. aeruginosa</i> stone 130                               | UP000017043       |
| 3            | <i>P. aeruginosa</i> S742-C15-BS                             | UP000194726       |
| 4            | <i>P. aeruginosa</i> MTB-1                                   | UP000018564       |
| 5            | <i>P. aeruginosa</i> S567-C10-BS                             | UP000194857       |
| 6            | <i>P. aeruginosa</i> WH-SGI-V-07379                          | UP000054840       |
| 7            | <i>P. aeruginosa</i> strain BL04                             | UP000017518       |
| 8            | <i>P. aeruginosa</i> P28a                                    | UP000216659       |
| 9            | <i>P. aeruginosa</i> MH27                                    | UP000018200       |
| 10           | <i>P. aeruginosa</i> UCBPP-PA-14                             | UP000000653       |
| 11           | <i>P. aeruginosa</i> WH-SGI-V-07064                          | UP000054218       |
| 12           | <i>P. aeruginosa</i> F34365                                  | UP000222703       |
| 13           | <i>P. aeruginosa</i> VRFPA01                                 | UP00017814        |
| 14           | <i>P. aeruginosa</i> PA34                                    | UP000223914       |
| 15           | <i>P. aeruginosa</i> MH19                                    | UP000043988       |
| 16           | <i>P. aeruginosa</i> ATCC 9027                               | UP000222431       |
| 17           | <i>P. aeruginosa</i> RNS-PA65                                | UP000222664       |
| 18           | <i>P. aeruginosa</i> X9820                                   | UP000226099       |
| 19           | <i>P. aeruginosa</i> PA7                                     | UP000001582       |
| 20           | <i>P. aeruginosa</i> VRFPA03                                 | UP000019105       |

**Supplementary Table ST-2 Identification of *P. aeruginosa* unique pathways with respect to human host using KEGG database**

| S.No | Unique pathways of <i>P. aeruginosa</i>                       |
|------|---------------------------------------------------------------|
| 1    | 01110 Biosynthesis of secondary metabolites                   |
| 2    | 01120 Microbial metabolism in diverse environments            |
| 3    | 01130 Biosynthesis of antibiotics                             |
| 4    | 01220 Degradation of aromatic compounds                       |
| 5    | 00660 C5-Branched dibasic acid metabolism                     |
| 6    | 00680 Methane metabolism                                      |
| 7    | 00300 Lysine biosynthesis                                     |
| 8    | 00460 Cyanoamino acid metabolism                              |
| 9    | 00473 D-Alanine metabolism                                    |
| 10   | 00540 Lipopolysaccharide biosynthesis                         |
| 11   | 00550 Peptidoglycan biosynthesis                              |
| 12   | 00903 Limonene and pinene degradation                         |
| 13   | 00281 Geraniol degradation                                    |
| 14   | 00523 Polyketide sugar unit biosynthesis                      |
| 15   | 01053 Biosynthesis of siderophore group nonribosomal peptides |
| 16   | 00332 Carbapenem biosynthesis                                 |
| 17   | 00261 Monobactam biosynthesis                                 |
| 18   | 00521 Streptomycin biosynthesis                               |
| 19   | 00525 Acarbose and validamycin biosynthesis                   |
| 20   | 00401 Novobiocin biosynthesis                                 |
| 21   | 00405 Phenazine biosynthesis                                  |
| 22   | 00362 Benzoate degradation                                    |
| 23   | 00627 Aminobenzoate degradation                               |
| 24   | 00364 Fluorobenzoate degradation                              |
| 25   | 00625 Chloroalkane and chloroalkene degradation               |
| 26   | 00361 Chlorocyclohexane and chlorobenzene degradation         |
| 27   | 00623 Toluene degradation                                     |
| 28   | 00622 Xylene degradation                                      |
| 29   | 00633 Nitrotoluene degradation                                |
| 30   | 00643 Styrene degradation                                     |
| 31   | 00930 Caprolactam degradation                                 |
| 32   | 00626 Naphthalene degradation                                 |
| 33   | 02060 Phosphotransferase system (PTS)                         |
| 34   | 03070 Bacterial secretion system                              |
| 35   | 02020 Two-component system                                    |
| 36   | 02024 Quorum sensing                                          |
| 37   | 02025 Biofilm formation - <i>Pseudomonas aeruginosa</i>       |
| 38   | 02030 Bacterial chemotaxis                                    |

|    |                                                        |
|----|--------------------------------------------------------|
| 39 | 02040 Flagellar assembly                               |
| 40 | 01501 beta-Lactam resistance                           |
| 41 | 01502 Vancomycin resistance                            |
| 42 | 01503 Cationic antimicrobial peptide (CAMP) resistance |

**Supplementary Table ST-3: Identification of MHC I epitopes using IEDB server, MHC-NP, NetCTLpan and NetMHCpan, and Class immunogenicity analysis**

| S.N o. | Protein ID, name                        | start | end | Epitope    | IEDB (MHC I binding)                | MHC-NP               | NetCTLpan                                                  | NetMHC                                   | Class I immunogenicity |
|--------|-----------------------------------------|-------|-----|------------|-------------------------------------|----------------------|------------------------------------------------------------|------------------------------------------|------------------------|
| 1      | Q9HU51, Uncharacterized protein         | 105   | 114 | LLAIQARAAY | HLA-B*15:01(0.15), HLA-B*35:01(0.2) | HLA-B*57:01 (0.8401) | -                                                          | HLA-B*15:01(0.3934)                      | 0.17652                |
|        |                                         | 181   | 190 | GELDSRREAL | HLA-B*40:01(0.2)                    | HLA-B*57:01 (0.6271) | -                                                          | HLA-B*40:01(0.0545)                      | 0.0641                 |
|        |                                         | 118   | 126 | REEYLKLLL  | HLA-B*40:01(0.2)                    | HLA-B*44:03 (0.3219) | HLA-B*40:01 (0.15)                                         | HLA-B*40:01(0.0931)                      | -0.20086               |
|        |                                         | 284   | 292 | LVSSTGAVY  | HLA-B*15:01(0.2)                    | HLA-B*53:01 (0.8156) | HLA-A*26:01 (0.80), HLA-B*15:01 (0.15), HLA-A*01:01 (0.30) | HLA-B*15:01(0.0467)                      | -0.09333               |
|        |                                         | 139   | 148 | TYDYINKAR  | HLA-A*33:01(0.2)                    | HLA-B*57:01 (0.4048) |                                                            | HLA-A*24:02(0.4971)                      | -0.01811               |
|        |                                         | 251   | 259 | RQRALAAER  | HLA-A*31:01(0.25)                   | HLA-B*44:03 (0.2556) |                                                            |                                          | 0.17372                |
| 2      | Q916G3, Uncharacterized protein         | 193   | 201 | VSNPALGAY  | HLA-A*30:02(0.1)                    | HLA-B*53:01 (0.681)  | HLA-A*01:01 (0.20), HLA-B*58:01(0.80), HLA-B*15:01(0.40)   | HLA-A*26:01 (0.3064)                     | 0.06586                |
|        |                                         | 35    | 44  | RLITDYPGRY | HLA-A*30:02(0.1)                    | HLA-B*57:01 (0.746)  |                                                            | HLA-A*03:01(0.4379)                      | 0.14866                |
|        |                                         | 236   | 244 | GESFNGMDI  | HLA-B*40:01(0.15)                   | HLA-B*53:01 (0.224)  |                                                            | HLA-B*40:01(0.2180)                      | -0.04554               |
|        |                                         | 237   | 246 | ESFNGMDIPV | HLA-A*68:02(0.15)                   | HLA-B*57:01 (0.5189) |                                                            |                                          | 0.02021                |
|        |                                         | 635   | 643 | NQAGYSLGV  | HLA-A*02:06(0.2)                    | HLA-B*44:03 (0.229)  |                                                            |                                          | -0.10209               |
|        |                                         | 561   | 569 | RLQPYASLR  | HLA-A*31:01(0.2)                    | HLA-B*53:01 (0.0727) | HLA-A*03:01(0.40)                                          | HLA-A*03:01(0.1270)                      | -0.16163               |
|        |                                         | 467   | 475 | LQAAGGPVL  | HLA-B*15:01(0.2)                    | HLA-B*53:01 (0.6489) | HLA-B*39:01(0.15), HLA-B*40:01(0.80)                       | HLA-B*39:01(0.0973)                      | 0.13173                |
|        |                                         | 66    | 74  | QTSRQDFTW  | HLA-B*58:01(0.2)                    | HLA-B*53:01 (0.7424) | HLA-B*58:01(0.05)                                          | HLA-B*58:01(0.0076)                      | 0.02794                |
|        |                                         | 43    | 51  | RYRGTAFA   | HLA-A*30:01(0.2)                    | HLA-B*53:01 (0.172)  |                                                            |                                          | 0.05431                |
|        |                                         | 391   | 400 | RAGVHLLGDY | HLA-A*30:02(0.2)                    | HLA-B*57:01 (0.9338) |                                                            |                                          | 0.10436                |
|        |                                         | 505   | 514 | RSGLAGLDY  | HLA-A*30:02(0.2)                    | HLA-B*57:01 (0.9042) |                                                            |                                          | 0.06264                |
|        |                                         | 542   | 550 | LEASLGWRL  | HLA-B*40:01(0.25)                   | HLA-B*44:03 (0.2787) | HLA-B*40:01(0.10)                                          | HLA-B*40:01(0.0556)                      | 0.08451                |
|        |                                         | 521   | 529 | DFREDEALR  | HLA-A*33:01(0.25)                   | HLA-B*53:01 (0.0711) |                                                            |                                          | 0.25994                |
|        |                                         | 466   | 474 | YLQAAGGPV  | HLA-A*02:03(0.25)                   | HLA-B*53:01 (0.0566) | HLA-A*02:01(0.80)                                          |                                          | 0.09389                |
|        |                                         | 66    | 74  | QTSRQDFTW  | HLA-B*57:01(0.25)                   | HLA-B*53:01 (0.7424) | HLA-B*58:01(0.05)                                          | HLA-B*58:01(0.0076)                      | 0.02794                |
|        |                                         | 344   | 352 | LTRLHDDRW  | HLA-B*57:01(0.25)                   | HLA-B*57:01 (0.9626) |                                                            | HLA-B*58:01(0.1614)                      | 0.13194                |
| 3      | Q9HVJ4, Probable outer membrane protein | 134   | 142 | RTADEAGRY  | HLA-A*30:02(0.1)                    | HLA-B*44:03 (0.6287) | HLA-A*01:01(0.05), HLA-A*26:01(0.30)                       | HLA-A*01:01(0.0704)                      | 0.22819                |
|        |                                         | 188   | 197 | QTISQVIGAY | HLA-A*30:02(0.1)                    | HLA-B*44:03 (0.7106) |                                                            | HLA-A*26:01(0.0225)                      | -0.01913               |
|        |                                         | 119   | 127 | GEYGRFSL   | HLA-B*40:01(0.15)                   | HLA-B*44:03 (0.2256) | HLA-B*39:01(0.40), HLA-B*40:01(0.01)                       | HLA-B*39:01(0.1811)                      | 0.12156                |
|        |                                         | 164   | 172 | TTAPLRLAR  | HLA-A*68:01(0.2)                    | HLA-B*44:03 (0.4345) |                                                            |                                          | 0.05296                |
|        |                                         | 190   | 198 | ISQVIGAYR  | HLA-A*31:01(0.2)                    | HLA-B*44:03 (0.3639) |                                                            |                                          | 0.1963                 |
|        |                                         | 306   | 315 | EYLRLIGSR  | HLA-A*33:01(0.2)                    | HLA-B*44:03 (0.2162) |                                                            |                                          | -0.02334               |
|        |                                         | 85    | 93  | AFNPKLVVR  | HLA-A*31:01(0.25)                   | HLA-B*53:01 (0.1518) |                                                            |                                          | -0.17474               |
| 4      | Q910E2, OpdB proline porin              | 173   | 181 | IQAGRFTAF  | HLA-B*15:01(0.1)                    | HLA-B*53:01 (0.7975) | HLA-B*08:01(0.80), HLA-B*15:01(0.05)                       | HLA-B*15:01(0.0070), HLA-B*08:01(0.3041) | 0.26302                |

|   |                                               |     |     |                |                                         |                         |                                                               |                         |          |
|---|-----------------------------------------------|-----|-----|----------------|-----------------------------------------|-------------------------|---------------------------------------------------------------|-------------------------|----------|
|   |                                               | 389 | 398 | RYLFASGPFK     | HLA-A*03:01(0.1),<br>HLA-A*03:01(0.15)  | HLA-B*57:01<br>(0.2756) |                                                               | HLA-A*03:01 (0.0294)    | 0.08214  |
|   |                                               | 33  | 42  | DYLEWRLNLR     | HLA-A*33:01(0.15)                       | HLA-B*57:01<br>(0.2147) |                                                               |                         | 0.33967  |
|   |                                               | 38  | 47  | RLNRRNYFLY     | HLA-A*30:02(0.15)                       | HLA-B*57:01<br>(0.7723) |                                                               |                         | 0.12283  |
|   |                                               | 223 | 231 | FAAQLDNVW      | HLA-B*53:01(0.2),<br>HLA-B*58:01(0.2)   | HLA-B*53:01<br>(0.4756) | HLA-B*58:01(0.40)                                             | HLA-B*58:01(0.0397)     | -0.07512 |
|   |                                               | 3   | 12  | RVRPVGRLAL     | HLA-B*07:02(0.2),<br>HLA-A*30:01(0.2)   | HLA-B*57:01<br>(0.9738) |                                                               |                         | 0.14106  |
|   |                                               | 43  | 52  | NYFLYNDYRR     | HLA-A*33:01(0.2)                        | HLA-B*57:01<br>(0.1376) |                                                               |                         | 0.06494  |
|   |                                               | 340 | 349 | SFMARYVSG<br>R | HLA-A*33:01(0.2),<br>HLA-A*31:01(0.25)  | HLA-B*57:01<br>(0.5972) |                                                               |                         | -0.05179 |
|   |                                               | 137 | 146 | GEMTVETPV<br>F | HLA-B*44:02(0.25)                       | HLA-B*57:01<br>(0.7617) | HLA-B*40:01(0.20)                                             | HLA-B*40:01(0.1780)     | 0.17106  |
|   |                                               | 267 | 275 | TLAYSLQLK      | HLA-A*03:01(0.25)                       | HLA-B*53:01<br>(0.2239) | HLA-A*03:01(0.80)                                             | HLA-A*03:01(0.1285)     | -0.2668  |
|   |                                               | 126 | 135 | KLRLGESLLK     | HLA-A*03:01(0.25)                       | HLA-B*57:01<br>(0.9662) |                                                               | HLA-B*27:05(0.4886)     | -0.03543 |
| 5 | Q9HYK0, Probable<br>outer membrane<br>protein | 207 | 215 | LEAMLGQAL      | HLA-B*40:01(0.15)                       | HLA-B*44:03<br>(0.3383) | HLA-B*39:01 (0.80),<br>HLA-B*40:01(0.15)                      | HLA-B*40:01(0.0379)     | -0.2178  |
|   |                                               | 259 | 267 | EAAAYEVER      | HLA-A*68:01(0.15)                       | HLA-B*53:01<br>(0.4454) |                                                               |                         | 0.23606  |
|   |                                               | 409 | 417 | YAYLNAWLR      | HLA-A*68:01(0.15)                       | HLA-B*53:01<br>(0.0795) |                                                               |                         | 0.19863  |
|   |                                               | 1   | 9   | MNRLRACL       | HLA-B*08:01(0.2)                        |                         | HLA-B*08:01(0.10)                                             |                         | 0.04089  |
|   |                                               | 356 | 364 | LAKVRAYEM      | HLA-B*08:01(0.2)                        | HLA-B*53:01<br>(0.3206) | HLA-B*08:01(0.30)                                             | HLA-B*08:01(0.0303)     | 0.11415  |
|   |                                               | 415 | 423 | WLRRLRQLAG     | HLA-B*08:01(0.2)                        | HLA-B*53:01<br>(0.0234) |                                                               |                         | -0.0395  |
|   |                                               | 23  | 32  | GLLDAYQLAV     | HLA-A*02:01(0.2)                        | HLA-B*07:02<br>(0.0096) |                                                               | HLA-A*02:01(0.0732)     | -0.04232 |
|   |                                               | 199 | 207 | RAAAARRTL      | HLA-B*07:02(0.2)                        | HLA-B*57:01<br>(0.7068) | HLA-B*07:02(0.20)                                             | HLA-B*07:02<br>(0.0826) | 0.20525  |
|   |                                               | 222 | 230 | APIERFPAL      | HLA-B*07:02(0.2)                        | HLA-B*07:02<br>(0.5309) | HLA-B*07:02(0.05),<br>HLA-B*08:01(0.05),<br>HLA-B*39:01(0.30) | HLA-B*07:02(0.0083)     | 0.31805  |
|   |                                               | 275 | 284 | RLSLYASSSK     | HLA-A*03:01(0.2)                        | HLA-B*57:01<br>(0.8215) |                                                               | HLA-A*03:01(0.1435)     | -0.42237 |
|   |                                               | 130 | 138 | LAVRLFAY       | HLA-B*35:01(0.2)                        | HLA-B*44:03<br>(0.8667) | HLA-B*15:01(0.30)                                             |                         | 0.22076  |
|   |                                               | 410 | 419 | AYLNAWLRLR     | HLA-A*31:01(0.25)                       | HLA-B*57:01<br>(0.675)  |                                                               |                         | 0.27045  |
|   |                                               | 330 | 338 | AQAELDAQV      | HLA-A*02:06(0.25)                       | HLA-B*44:03<br>(0.7056) |                                                               |                         | 0.08887  |
| 6 | Q9HYQ6, Patatin-<br>like protein, PlpD        | 105 | 113 | KQDDRDFLV      | HLA-A*02:06(0.1)                        | HLA-A*02:01<br>(0.2008) |                                                               | HLA-A*02:01(0.4343)     | 0.19312  |
|   |                                               | 425 | 433 | STFNLGGSY      | HLA-A*30:02(0.1),<br>HLA-A*68:01(0.15)  | HLA-B*44:03<br>(0.8235) | HLA-B*15:01(0.30)                                             | HLA-A*03:01(0.3294)     | -0.01547 |
|   |                                               | 470 | 478 | RYFVAPFLF      | HLA-A*23:01(0.1),<br>HLA-A*24:02(0.1)   | HLA-B*53:01<br>(0.4128) | HLA-A*24:02(0.01)                                             | HLA-A*24:02(0.2738)     | 0.19952  |
|   |                                               | 189 | 198 | MSIPAVFAPV     | HLA-A*68:02(0.1),<br>HLA-A*02:06(0.15)  | HLA-B*57:01<br>(0.5672) |                                                               |                         | 0.24708  |
|   |                                               | 60  | 69  | SMGAVVGG<br>LY | HLA-A*30:02(0.1),<br>HLA-A*30:02(0.2)   | HLA-B*44:03<br>(0.7914) |                                                               |                         | 0.18479  |
|   |                                               | 616 | 625 | AEVVTSSFTL     | HLA-B*40:01(0.15)                       | HLA-B*57:01<br>(0.6347) |                                                               | HLA-B*40:01(0.1283)     | -0.10261 |
|   |                                               | 74  | 83  | TPAELERIAL     | HLA-B*07:02(0.15)                       | HLA-B*57:01<br>(0.8672) |                                                               | HLA-B*07:02(0.0362)     | 0.38405  |
|   |                                               | 313 | 322 | KPKDLNSEAL     | HLA-B*07:02(0.15)                       | HLA-B*57:01<br>(0.893)  |                                                               | HLA-B*07:02(0.0277)     | -0.11315 |
|   |                                               | 645 | 653 | SLGRIVYYR      | HLA-A*31:01(0.15),<br>HLA-A*68:01(0.15) | HLA-B*44:03<br>(0.3347) |                                                               | HLA-A*03:01(0.3680)     | 0.22626  |
|   |                                               | 651 | 660 | YRRLTERSF      | HLA-A*24:02(0.15)                       | HLA-B*57:01<br>(0.7592) |                                                               | HLA-A*24:02(0.4874)     | 0.13715  |
|   |                                               | 660 | 669 | FLPLDFPLYL     | HLA-A*02:01(0.2)                        | HLA-B*57:01<br>(0.5819) |                                                               | HLA-A*02:01(0.0381)     | 0.09888  |
|   |                                               | 694 | 703 | SLMIGFDTPL     | HLA-A*02:01(0.2)                        | HLA-B*53:01<br>(0.3825) |                                                               |                         | 0.27108  |
|   |                                               | 545 | 553 | GYELKYSF       | HLA-A*23:01(0.2)                        | HLA-B*44:03<br>(0.5956) | HLA-A*24:02(0.10)                                             | HLA-A*24:02(0.0170)     | -0.21403 |
|   |                                               | 476 | 484 | FLFHEAQN       | HLA-A*02:01(0.2)                        | HLA-A*02:01             | HLA-A*02:01(0.10)                                             | HLA-A*02:01(0.0126)     | 0.10334  |

|   |                                          |     |                |                   |                                        |                                         |                                         |                     |          |
|---|------------------------------------------|-----|----------------|-------------------|----------------------------------------|-----------------------------------------|-----------------------------------------|---------------------|----------|
|   |                                          |     |                |                   | (0.2671)                               |                                         |                                         |                     |          |
|   | 67                                       | 76  | GLYASGYTPA     | HLA-A*02:03(0.2)  | HLA-B*57:01<br>(0.2829)                |                                         |                                         | -0.06713            |          |
|   | 603                                      | 611 | WVFGGGYGR      | HLA-A*68:01(0.2)  | HLA-B*53:01<br>(0.113)                 |                                         |                                         | 0.15368             |          |
|   | 181                                      | 189 | LPQAIRASM      | HLA-B*07:02(0.2)  | HLA-B*07:02<br>(0.3453)                | HLA-B*08:01(0.80),<br>HLA-B*07:02(0.05) | HLA-B*07:02(0.0078)                     | 0.11645             |          |
|   | 379                                      | 387 | DYFDQVQYR      | HLA-A*33:01(0.2)  | HLA-B*53:01<br>(0.1365)                |                                         |                                         | -0.11354            |          |
|   | 720                                      | 728 | FYLNLGQNF      | HLA-A*23:01(0.25) | HLA-B*53:01<br>(0.6899)                | HLA-A*24:02(0.10)                       | HLA-A*24:02(0.0138)                     | -0.09055            |          |
|   | 440                                      | 449 | RLGAEWLTR<br>V | HLA-A*02:03(0.25) | HLA-B*57:01<br>(0.6941)                |                                         | HLA-A*02:01(0.3154)                     | 0.41613             |          |
|   | 186                                      | 195 | RASMSIPAVF     | HLA-B*15:01(0.25) | HLA-B*57:01<br>(0.7732)                |                                         | HLA-B*58:01(0.1804)                     | -0.2152             |          |
|   | 476                                      | 484 | FLFHEAQN       | HLA-A*02:03(0.25) | HLA-A*02:01<br>(0.2671)                | HLA-A*02:01(0.10)                       | HLA-A*02:01(0.0126)                     | 0.10334             |          |
|   | 650                                      | 658 | VYYRRLTER      | HLA-A*31:01(0.25) | HLA-B*53:01<br>(0.0909)                |                                         |                                         | 0.1821              |          |
| 7 | Q9I0W0, Outer membrane protein CzcC      | 392 | 401            | RTLGVRAQY         | HLA-A*30:02(0.1)                       | HLA-B*57:01<br>(0.9746)                 |                                         | HLA-B*58:01(0.3341) | 0.1252   |
|   |                                          | 233 | 242            | VPASITRGAL        | HLA-B*07:02(0.15)                      | HLA-B*57:01<br>(0.8319)                 |                                         | HLA-B*07:02(0.0245) | 0.11381  |
|   |                                          | 152 | 160            | RVRLAKTSL         | HLA-B*07:02(0.2)                       | HLA-B*57:01<br>(0.2006)                 | HLA-B*07:02(0.10),<br>HLA-B*08:01(0.80) | HLA-B*07:02(0.0692) | -0.22316 |
|   |                                          | 258 | 266            | EVARGEAQV         | HLA-A*68:02(0.2)                       | HLA-B*53:01<br>(0.4954)                 |                                         |                     | 0.15737  |
|   |                                          | 373 | 381            | MTRGFEMGK         | HLA-A*30:01(0.2)                       | HLA-B*53:01<br>(0.1676)                 |                                         | HLA-A*03:01(0.1147) | 0.13075  |
|   |                                          | 273 | 281            | RIPNLTVSI         | HLA-A*32:01(0.2)                       | HLA-A*02:01<br>(0.2798)                 |                                         |                     | -0.04619 |
|   |                                          | 334 | 342            | LLRLRSEAV         | HLA-B*08:01(0.2)                       | HLA-A*02:01<br>(0.0807)                 | HLA-B*08:01(0.10)                       | HLA-B*08:01(0.0564) | 0.00767  |
|   |                                          | 294 | 302            | GERVNLIGL         | HLA-B*40:01(0.25)                      | HLA-B*53:01<br>(0.0519)                 | HLA-B*40:01(0.40)                       | HLA-B*40:01(0.1368) | 0.17372  |
| 8 | Q9I2I2, Probable TonB-dependent receptor | 380 | 388            | DEIAFGPDW         | HLA-B*44:02(0.1),<br>HLA-B*44:03(0.1)  | HLA-B*53:01<br>(0.6272)                 |                                         |                     | 0.23207  |
|   |                                          | 14  | 23             | RLARAVPFLY        | HLA-A*30:02(0.1)                       | HLA-B*57:01<br>(0.8863)                 | HLA-A*02:01(0.30)                       | HLA-A*03:01(0.3228) | 0.22496  |
|   |                                          | 522 | 530            | LELGGGVDL         | HLA-B*40:01(0.15)                      | HLA-B*53:01<br>(0.5935)                 | HLA-B*40:01(0.10)                       | HLA-B*40:01(0.0361) | 0.1432   |
|   |                                          | 68  | 77             | RPVRDLQEAL        | HLA-B*07:02(0.15)                      | HLA-B*57:01<br>(0.9091)                 | HLA-B*07:02(0.80)                       | HLA-B*07:02(0.0263) | 0.0746   |
|   |                                          | 407 | 416            | SPRLYLLHHL        | HLA-B*07:02(0.15)                      | HLA-B*57:01<br>(0.9066)                 |                                         | HLA-B*07:02(0.3545) | 0.027    |
|   |                                          | 411 | 419            | YLLHHLSDV         | HLA-A*02:03(0.15)                      | HLA-A*02:01<br>(0.5492)                 | HLA-A*02:01(0.80)                       | HLA-A*02:01(0.0792) | -0.07665 |
|   |                                          | 304 | 312            | RTYRNRLER         | HLA-A*31:01(0.15)                      | HLA-B*57:01<br>(0.1241)                 | HLA-A*03:01(0.30)                       | HLA-A*03:01(0.1019) | 0.14244  |
|   |                                          | 400 | 409            | EAFGWESSPR        | HLA-A*68:01(0.15)                      | HLA-B*57:01<br>(0.7222)                 |                                         |                     | 0.08347  |
|   |                                          | 451 | 460            | FTIYGNDPLK        | HLA-A*68:01(0.15)                      | HLA-B*57:01<br>(0.7442)                 |                                         |                     | 0.06798  |
|   |                                          | 287 | 296            | RWSLAHNGQ<br>W    | HLA-B*58:01(0.15)                      | HLA-B*57:01<br>(0.7864)                 |                                         | HLA-B*58:01(0.1762) | -0.04043 |
|   |                                          | 162 | 170            | ITRRATDTW         | HLA-B*57:01(0.15)                      | HLA-B*53:01<br>(0.6409)                 | HLA-B*58:01(0.05)                       | HLA-B*58:01(0.0158) | 0.18492  |
|   |                                          | 21  | 30             | FLYLLPCLAL        | HLA-A*02:01(0.2)                       | HLA-B*57:01<br>(0.2243)                 |                                         |                     | -0.07121 |
|   |                                          | 404 | 412            | WESSPRLYL         | HLA-B*40:01(0.2)                       | HLA-B*53:01<br>(0.191)                  | HLA-B*40:01(0.10)                       | HLA-B*39:01(0.3844) | 0.19377  |
|   |                                          | 23  | 31             | YLLPCLALA         | HLA-A*02:01(0.2),<br>HLA-A*02:06(0.25) | HLA-B*53:01<br>(0.1066)                 | HLA-A*02:01(0.20)                       | HLA-A*02:01(0.3338) | -0.05116 |
|   |                                          | 201 | 209            | VPGKLG LAL        | HLA-B*07:02(0.2)                       | HLA-B*07:02<br>(0.1291)                 | HLA-B*07:02(0.15)                       | HLA-B*07:02(0.0165) | -0.1714  |
|   |                                          | 595 | 603            | YALPAYSLW         | HLA-B*58:01(0.2),<br>HLA-B*57:01(0.25) | HLA-B*53:01<br>(0.8414)                 | HLA-A*24:02(0.40)                       | HLA-B*58:01(0.0054) | 0.12624  |
|   |                                          | 436 | 445            | KQLSPEYAAV        | HLA-A*02:06(0.25)                      | HLA-B*57:01<br>(0.7767)                 | HLA-A*02:01(0.80)                       |                     | -0.03097 |
|   |                                          | 574 | 583            | FSAQLRTEYV        | HLA-A*68:02(0.25)                      | HLA-B*57:01<br>(0.9515)                 | HLA-A*26:01(0.30)                       |                     | 0.05462  |
|   |                                          | 364 | 372            | NTAGDASAR         | HLA-A*68:02(0.25)                      | HLA-B*53:01                             |                                         |                     | -0.01153 |

|    |                                                        |     |     |            |                                                               |                     |                   |                                            |          |
|----|--------------------------------------------------------|-----|-----|------------|---------------------------------------------------------------|---------------------|-------------------|--------------------------------------------|----------|
|    |                                                        |     |     |            |                                                               | (0.1965)            |                   |                                            |          |
|    |                                                        | 49  | 57  | KLRDAPASV  | HLA-A*02:03(0.25)                                             | HLA-A*02:01(0.7401) | HLA-A*02:01(0.80) | HLA-A*02:01(0.2252)                        | 0.00314  |
|    |                                                        | 288 | 296 | WSLAHNGQW  | HLA-B*57:01(0.25)                                             | HLA-B*53:01(0.798)  | HLA-B*58:01(0.20) | HLA-B*58:01(0.0741)                        | 0.0221   |
|    |                                                        | 428 | 436 | RGYKAPSLK  | HLA-A*03:01(0.25)                                             | HLA-B*53:01(0.1262) | HLA-A*03:01(0.30) | HLA-A*03:01(0.1234)                        | -0.33664 |
| 9  | Q9I4U9, Probable porin                                 | 293 | 302 | RMSGDSGFAY | HLA-A*30:02(0.1)                                              | HLA-B*53:01(0.52)   |                   | HLA-A*03:01(0.4685)                        | -0.00554 |
|    |                                                        | 325 | 333 | RSWQLRYDY  | HLA-A*30:02(0.15)                                             | HLA-B*44:03(0.598)  | HLA-B*58:01(0.40) | HLA-B*58:01(0.2830)                        | 0.0031   |
|    |                                                        | 302 | 311 | YLAGTDPYLV | HLA-A*02:01(0.15),<br>HLA-A*02:03(0.15),<br>HLA-A*02:06(0.25) | HLA-B*57:01(0.5534) |                   | HLA-A*02:01(0.0559)                        | 0.08616  |
|    |                                                        | 64  | 72  | YESGYTEGL  | HLA-B*40:01(0.15)                                             | HLA-B*53:01(0.4653) | HLA-B*39:01(0.80) | HLA-B*39:01(0.2399)                        | 0.11764  |
|    |                                                        | 6   | 15  | VPMLAAGLAL | HLA-B*07:02(0.15),<br>HLA-A*02:03(0.2)                        | HLA-B*57:01(0.3859) |                   | HLA-B*07:02(0.0313)                        | 0.05344  |
|    |                                                        | 285 | 293 | HAFGLGYQR  | HLA-A*68:01(0.15)                                             | HLA-B*44:03(0.53)   |                   |                                            | 0.0224   |
|    |                                                        | 343 | 351 | LTFMSRYLR  | HLA-A*68:01(0.15),<br>HLA-A*31:01(0.15)                       | HLA-B*44:03(0.083)  |                   |                                            | -0.26068 |
|    |                                                        | 273 | 281 | ALNALFTYR  | HLA-A*31:01(0.15)                                             | HLA-B*44:03(0.7219) | HLA-A*03:01(0.40) | HLA-A*03:01(0.1388)                        | 0.16727  |
|    |                                                        | 319 | 327 | FANKDERSW  | HLA-B*53:01(0.2)                                              | HLA-B*53:01(0.9372) | HLA-B*58:01(0.80) | HLA-B*58:01(0.0270)                        | -0.15623 |
|    |                                                        | 33  | 41  | ELRNFYFNR  | HLA-A*33:01(0.2)                                              | HLA-B*44:03(0.2008) |                   |                                            | 0.21583  |
|    |                                                        | 132 | 140 | TLMPRLPVV  | HLA-A*02:01(0.2)                                              | HLA-A*02:01(0.6455) | HLA-A*02:01(0.10) | HLA-B*08:01(0.0773)<br>HLA-A*02:01(0.0137) | -0.01344 |
|    |                                                        | 226 | 234 | YANLEDFYR  | HLA-A*68:01(0.2),<br>HLA-A*33:01(0.2)                         | HLA-B*53:01(0.3909) |                   |                                            | 0.20176  |
|    |                                                        | 206 | 215 | RDFAGGTYR  | HLA-A*31:01(0.2)                                              | HLA-B*53:01(0.6491) | HLA-A*01:01(0.80) |                                            | 0.2586   |
|    |                                                        | 44  | 52  | RQPGASQSY  | HLA-B*15:01(0.2)                                              | HLA-B*44:03(0.3557) | HLA-B*15:01(0.40) | HLA-B*15:01(0.0115)                        | -0.28155 |
|    |                                                        | 134 | 142 | MPRLPVVQF  | HLA-B*07:02(0.2)                                              | HLA-B*35:01(0.8115) | HLA-B*07:02(0.05) | HLA-B*07:02(0.0156)                        | 0.00086  |
|    |                                                        | 48  | 56  | ASQSYSEEW  | HLA-B*58:01(0.2)                                              | HLA-B*53:01(0.8914) | HLA-B*58:01(0.15) | HLA-B*58:01(0.0256)                        | -0.2204  |
|    |                                                        | 250 | 258 | QSLKSDIRW  | HLA-B*58:01(0.2)                                              | HLA-B*57:01(0.7409) | HLA-B*58:01(0.10) | HLA-B*58:01(0.0073)                        | -0.21826 |
|    |                                                        | 120 | 129 | KLRVSHSTLK | HLA-A*03:01(0.2)                                              | HLA-B*57:01(0.9575) |                   | HLA-A*03:01(0.0749)                        | -0.20071 |
|    |                                                        | 308 | 316 | PYLVNFVQI  | HLA-A*23:01(0.25)                                             | HLA-B*53:01(0.115)  | HLA-A*24:02(0.15) | HLA-A*24:02(0.1399)                        | 0.109    |
|    |                                                        | 36  | 44  | NFYFNRDYR  | HLA-A*33:01(0.25)                                             | HLA-B*44:03(0.0702) |                   |                                            | 0.17558  |
|    |                                                        | 55  | 63  | EWAQGFLLR  | HLA-A*33:01(0.25)                                             | HLA-B*44:03(0.4547) |                   |                                            | 0.0235   |
| 10 | Q9I319, Type III secretion outer membrane protein PscC | 470 | 478 | VPWLGDIPIY | HLA-B*35:01(0.1)                                              | HLA-B*35:01(0.2663) |                   |                                            | 0.22046  |
|    |                                                        | 81  | 89  | ASLYNLGWY  | HLA-A*30:02(0.15)                                             | HLA-B*44:03(0.3651) |                   |                                            | 0.13396  |
|    |                                                        | 89  | 98  | YYDGTVLYVF | HLA-A*23:01(0.15),<br>HLA-A*24:02(0.15)                       | HLA-B*53:01(0.6136) |                   | HLA-A*24:02(0.0578)                        | 0.12986  |
|    |                                                        | 32  | 40  | YVAQGESLR  | HLA-A*68:01(0.15)                                             | HLA-B*53:01(0.4613) |                   |                                            | -0.12271 |
|    |                                                        | 123 | 131 | TAAGIWEAR  | HLA-A*68:01(0.15)                                             | HLA-B*53:01(0.5676) |                   |                                            | 0.49227  |
|    |                                                        | 120 | 128 | RALTAAGIW  | HLA-B*57:01(0.15)                                             | HLA-B*53:01(0.7294) | HLA-B*58:01(0.20) | HLA-B*58:01(0.0267)                        | 0.21675  |
|    |                                                        | 200 | 209 | IEAPGIASIL | HLA-B*40:01(0.2)                                              | HLA-B*57:01(0.9009) | HLA-B*40:01(0.30) | HLA-B*40:01(0.0835)                        | 0.13911  |
|    |                                                        | 338 | 346 | FLLAKVTLL  | HLA-A*02:01(0.2)                                              | HLA-A*02:01(0.5177) | HLA-A*02:01(0.05) | HLA-A*02:01(0.0174)                        | -0.10909 |
|    |                                                        | 179 | 187 | EIFPLRYAV  | HLA-A*68:02(0.2)                                              | HLA-B*44:03(0.4313) |                   |                                            | 0.0845   |
|    |                                                        | 80  | 88  | MASLYNLGW  | HLA-B*57:01(0.2),<br>HLA-B*57:01(0.2)                         | HLA-B*53:01(0.4774) | HLA-B*58:01(0.05) | HLA-B*58:01(0.0339)                        | -0.06411 |
| 11 | Q9I473, Probable tonB-dependent                        | 521 | 529 | LPRRARRMF  | HLA-B*07:02(0.1)                                              | HLA-B*57:01(0.407)  | HLA-B*08:01(0.80) | HLA-B*07:02(0.1439)                        | 0.09678  |



|     |                                                  |           |                                       |                     |                                        |                     |                                       |                                            |             |
|-----|--------------------------------------------------|-----------|---------------------------------------|---------------------|----------------------------------------|---------------------|---------------------------------------|--------------------------------------------|-------------|
|     | receptor                                         | 572       | 580                                   | SEYRLNDEW           | HLA-B*44:03(0.1)                       | HLA-B*44:03(0.442)  |                                       |                                            | 0.11121     |
|     |                                                  | 323       | 332                                   | AEGHVLTLGY          | HLA-B*44:03(0.15)                      | HLA-B*57:01(0.8767) |                                       |                                            | 0.11993     |
|     |                                                  | 93        | 101                                   | TESDHVLVL           | HLA-B*40:01(0.15)                      | HLA-B*53:01(0.6523) | HLA-B*39:01(0.80)                     | HLA-B*39:01(0.1398)                        | 0.05374     |
|     |                                                  | 197       | 205                                   | DTAGINTKR           | HLA-A*68:01(0.15)                      | HLA-B*53:01(0.1578) |                                       |                                            | 0.07707     |
|     |                                                  | 401       | 409                                   | TVSYGTAFK           | HLA-A*68:01(0.15),<br>HLA-A*11:01(0.2) | HLA-B*53:01(0.2427) | HLA-B*58:01(0.80)                     | HLA-A*03:01(0.0948)                        | 0.11354     |
|     |                                                  | 302       | 311                                   | RFYSRFDTRR          | HLA-A*31:01(0.15)                      | HLA-B*57:01(0.6709) |                                       |                                            | 0.08061     |
|     |                                                  | 350       | 359                                   | RLNKGWFAQ<br>Y      | HLA-A*30:02(0.15)                      | HLA-B*57:01(0.7329) |                                       | HLA-B*15:01(0.1969)                        | 0.10514     |
|     |                                                  | 486       | 494                                   | VELVLGSQW           | HLA-B*44:03(0.15)                      | HLA-B*53:01(0.7497) |                                       |                                            | -0.14826    |
|     |                                                  | 392       | 400                                   | YALSDALRF           | HLA-B*53:01(0.2),<br>HLA-A*02:01(0.25) | HLA-B*53:01(0.8277) | HLA-B*58:01(0.80)                     | HLA-B*58:01(0.0957)                        | -0.09076    |
|     |                                                  | 297       | 306                                   | AYQDGRFYSR          | HLA-A*31:01(0.2)                       | HLA-B*44:03(0.4147) |                                       |                                            | 0.07854     |
|     |                                                  | 130       | 138                                   | VVRGPRSSL           | HLA-B*07:02(0.2)                       | HLA-B*07:02(0.6918) | HLA-B*07:02(0.20)                     | HLA-B*07:02(0.0376)<br>HLA-B*08:01(0.3152) | -0.14746    |
|     |                                                  | 590       | 598                                   | FGADHETAY           | HLA-B*35:01(0.2)                       | HLA-B*53:01(0.9534) | HLA-A*26:01(0.80)                     | HLA-B*15:01(0.2933)                        | 0.21639     |
|     |                                                  | 608       | 616                                   | YLSVRYQAL           | HLA-B*08:01(0.2)                       | HLA-B*53:01(0.1455) | HLA-B*08:01(0.01)                     | HLA-B*08:01(0.0090)                        | -0.04014    |
|     |                                                  | 12        | Q91792,<br>Uncharacterized<br>protein | 481                 | 489                                    | VEWAPLRPW           | HLA-B*44:02(0.1),<br>HLA-B*44:03(0.1) | HLA-B*44:03(0.5076)                        |             |
| 158 | 166                                              |           |                                       | SPRELTMSF           | HLA-B*07:02(0.1)                       | HLA-B*44:03(0.3969) | HLA-B*07:02(0.01)                     | HLA-B*07:02(0.0060)                        | -0.10157    |
| 269 | 277                                              |           |                                       | HSDSQSLFY           | HLA-A*01:01(0.1)                       | HLA-B*53:01(0.7565) | HLA-A*01:01(0.01)                     |                                            | -0.36876    |
| 491 | 499                                              |           |                                       | QEYGVAFAY           | HLA-B*44:03(0.1)                       | HLA-B*44:03(0.7629) | HLA-B*40:01(0.80)                     |                                            | 0.2<br>3159 |
| 76  | 84                                               |           |                                       | IELEGAGHL           | HLA-B*40:01(0.15)                      | HLA-B*44:03(0.6337) | HLA-B*40:01(0.05)                     |                                            | 0.21448     |
| 234 | 242                                              |           |                                       | GEQQMGLGL           | HLA-B*40:01(0.15)                      | HLA-B*44:03(0.2411) | HLA-B*40:01(0.15)                     |                                            | -0.8282     |
| 554 | 562                                              |           |                                       | IYFRVDAFF           | HLA-A*23:01(0.15)                      | HLA-B*53:01(0.4703) | HLA-A*24:02(0.01)                     | HLA-A*24:02(0.0180)                        | 0.25258     |
| 531 | 539                                              |           |                                       | FAASVGFAR           | HLA-A*68:01(0.15),                     | HLA-B*53:01(0.2677) |                                       |                                            | 0.03999     |
| 313 | 321                                              |           |                                       | RSHQFRAER           | HLA-A*31:01(0.15)                      | HLA-B*57:01(0.3629) |                                       |                                            | 0.14818     |
| 530 | 539                                              |           |                                       | YFAASVGFAR          | HLA-A*68:01(0.15),<br>HLA-A*33:01(0.2) | HLA-B*53:01(0.5216) |                                       |                                            | 0.08473     |
| 104 | 113                                              |           |                                       | GQLNALLKAV          | HLA-A*02:06(0.2)                       | HLA-B*57:01(0.6311) |                                       |                                            | -0.15239    |
| 423 | 431                                              |           |                                       | GERFSFDSL           | HLA-B*40:01(0.2)                       | HLA-B*53:01(0.2919) | HLA-B*40:01(0.30)                     |                                            | 0.00576     |
| 497 | 505                                              |           |                                       | FAYDVG VIR          | HLA-A*68:01(0.2)                       | HLA-B*44:03(0.1643) |                                       |                                            | 0.20582     |
| 109 | 117                                              |           |                                       | LLKAVTDHY           | HLA-B*15:01(0.2)                       | HLA-B*53:01(0.4911) | HLA-B*15:01(0.30)                     |                                            | 0.08373     |
| 489 | 497                                              |           |                                       | WLQEYGVAF           | HLA-B*15:01(0.2)                       | HLA-B*44:03(0.527)  | HLA-B*15:01(0.40)                     |                                            | 0.14915     |
| 414 | 422                                              |           |                                       | SYLQPFQLW           | HLA-A*24:02(0.2)                       | HLA-B*44:03(0.6599) | HLA-A*24:02(0.01)                     | HLA-A*24:02(0.0061)                        | -0.125      |
| 273 | 281                                              | QSLFYSLPW | HLA-B*58:01(0.2)                      | HLA-B*44:03(0.468)  | HLA-B*58:01(0.10)                      |                     | -0.06097                              |                                            |             |
| 529 | 537                                              | RYFAASVGF | HLA-A*23:01(0.25)                     | HLA-B*44:03(0.1984) | HLA-A*24:02(0.10)                      | HLA-A*24:02(0.0167) | 0.01438                               |                                            |             |
| 13  | P35818,<br>Type II secretion<br>system protein D | 596       | 605                                   | MVFLRPTVVR          | HLA-A*68:01(0.15)                      | HLA-B*35:01(0.0667) |                                       |                                            | 0.16194     |
|     |                                                  | 594       | 603                                   | NLMVFLRPTV          | HLA-A*02:01(0.2)                       | HLA-B*57:01(0.7367) |                                       |                                            | 0.14978     |
|     |                                                  | 575       | 584                                   | DIPLLGR LFR         | HLA-A*33:01(0.2)                       | HLA-B*57:01(0.9717) |                                       |                                            | 0.1152      |
|     |                                                  | 277       | 285                                   | RSANTRVIR           | HLA-A*31:01(0.2)                       | HLA-B*57:01(0.0888) |                                       |                                            | 0.20531     |
|     |                                                  | 93        | 101                                   | AQLSLSEVY           | HLA-B*15:01(0.2)                       | HLA-B*57:01(0.5207) | HLA-B*15:01(0.30)                     | HLA-B*15:01(0.0279)                        | -0.22798    |

|    |                                        |     |     |               |                                       |                             |                    |                         |          |
|----|----------------------------------------|-----|-----|---------------|---------------------------------------|-----------------------------|--------------------|-------------------------|----------|
|    |                                        | 75  | 83  | ETFVVDPRV     | HLA-A*68:02(0.2)                      | HLA-B*44:03<br>(0.2039)     |                    |                         | 0.1615   |
|    |                                        | 49  | 57  | QEAHWTINL     | HLA-B*40:01(0.25)                     | HLA-B*44:03<br>(0.105)      | HLA-B*40:01(0.30)  | HLA-B*40:01(0.1275)     | 0.40603  |
|    |                                        | 50  | 58  | EAHWTINLK     | HLA-A*68:01(0.25)                     | HLA-B*53:01<br>(0.6433)     |                    |                         | 0.38453  |
|    |                                        | 504 | 512 | HINDGAALR     | HLA-A*68:01(0.25)                     | HLA-B*53:01<br>(0.3047)     |                    |                         | 0.11659  |
|    |                                        | 8   | 17  | ALFAPSSRSY    | HLA-B*15:01(0.25)                     | HLA-B*57:01<br>(0.9073)     |                    | HLA-A*03:01(0.1433)     | -0.30324 |
| 14 | Q9I3A9,<br>Uncharacterized<br>protein  | 487 | 495 | YENDVDWRY     | HLA-B*44:03(0.1)                      | HLA-B*53:01<br>(0.801)      |                    |                         | 0.29848  |
|    |                                        | 694 | 702 | LYFSAEVTF     | HLA-A*23:01(0.15)                     | HLA-B*53:01<br>(0.8723)     | HLA-A*24:02 (0.10) | HLA-A*24:02(0.0174)     | 0.0614   |
|    |                                        | 113 | 122 | SVYRPLASV     | HLA-A*02:03(0.15)                     | HLA-B*57:01<br>(0.711)      |                    | HLA-A*02:01(0.2802)     | -0.001   |
|    |                                        | 556 | 565 | GLISDPLSVV    | HLA-A*02:03(0.15)                     | HLA-B*57:01<br>(0.6296)     |                    | HLA-A*02:01(0.1215)     | -0.23841 |
|    |                                        | 398 | 406 | RLNGLSYR      | HLA-A*31:01(0.15)                     | HLA-B*44:03<br>(0.146)      | HLA-A*03:01(0.30)  | HLA-A*03:01(0.0371)     | -0.12933 |
|    |                                        | 642 | 650 | SLNGHRFER     | HLA-A*31:01(0.15)                     | HLA-B*53:01<br>(0.196)      |                    | HLA-A*03:01(0.4492)     | 0.26952  |
|    |                                        | 406 | 415 | RYDQANSETF    | HLA-A*24:02(0.15)                     | HLA-B*57:01<br>(0.5648)     |                    | HLA-A*24:02(0.0700)     | -0.12611 |
|    |                                        | 687 | 696 | RYDSRHLLYF    | HLA-A*24:02(0.15)                     | HLA-B*57:01<br>(0.8132)     |                    | HLA-A*24:02<br>(0.1162) | -0.09933 |
|    |                                        | 271 | 279 | NSDTLAHDY     | HLA-A*01:01(0.15)                     | HLA-B*53:01<br>(0.8508)     | HLA-A*01:01(0.01)  |                         | 0.11255  |
|    |                                        | 654 | 663 | RLAKRIPLGK    | HLA-A*03:01(0.15)                     | HLA-B*57:01<br>(0.9696)     |                    | HLA-B*08:01(0.2295)     | -0.0243  |
|    |                                        | 256 | 265 | YAYRSPFPQV    | HLA-A*02:06(0.2)                      | H-2-<br>Kb(0.6443)          |                    |                         | -0.08786 |
|    |                                        | 48  | 57  | AEVPGSISVL    | HLA-B*40:01(0.2)                      | HLA-B*57:01<br>(0.7872)     |                    | HLA-B*40:01(0.0155)     | -0.11608 |
|    |                                        | 530 | 538 | REIGYNGFF     | HLA-B*40:01(0.2)                      | HLA-B*44:03<br>(0.4882)     | HLA-B*40:01(0.10)  | HLA-B*40:01(0.1365)     | 0.16461  |
|    |                                        | 16  | 25  | LLFGSKLAAA    | HLA-A*02:03(0.2)                      | HLA-A*02:01<br>(0.5931)     |                    |                         | -0.25356 |
|    |                                        | 133 | 141 | DVERIEVFR     | HLA-A*68:01(0.2)                      | HLA-B*35:01<br>(0.1908)     |                    |                         | 0.4167   |
|    |                                        | 531 | 539 | EIGYNGFFR     | HLA-A*68:01(0.2)                      | HLA-B*44:03<br>(0.1239)     |                    |                         | 0.20008  |
|    |                                        | 466 | 474 | LFNPQHSLR     | HLA-A*31:01(0.2)                      | HLA-B*53:01<br>(0.5312)     |                    |                         | -0.24171 |
|    |                                        | 1   | 9   | MPIASRAPV     | HLA-B*07:02(0.2)                      |                             | HLA-B*07:02(0.05)  | HLA-B*07:02(0.0711)     | -0.00327 |
|    |                                        | 254 | 262 | HPYAYRSPF     | HLA-B*07:02(0.2),<br>HLA-B*35:01(0.2) | HLA-B*44:03<br>(0.0733)     | HLA-B*07:02(0.01)  | HLA-B*07:02(0.0274)     | -0.06281 |
|    |                                        | 458 | 466 | SPRLAVNYL     | HLA-B*07:02(0.2)                      | HLA-B*07:02<br>(0.5578)     | HLA-B*07:02(0.05)  | HLA-B*07:02(0.0087)     | 0.07498  |
|    |                                        | 311 | 319 | NACEAGIAF     | HLA-B*35:01(0.2)                      | HLA-B*44:03<br>(0.8723)     |                    |                         | 0.28843  |
|    |                                        | 138 | 146 | EVFRGPNTV     | HLA-A*68:02(0.2)                      | HLA-B*53:01<br>(0.2236)     |                    | HLA-A*26:01(0.4431)     | 0.12986  |
|    |                                        | 619 | 627 | GSAGWMHD<br>W | HLA-B*57:01(0.2)                      | HLA-B*53:01<br>(0.8763)     | HLA-B*58:01(0.15)  | HLA-B*58:01(0.0296)     | 0.13746  |
|    |                                        | 496 | 504 | RVRHLTPAP     | HLA-A*30:01(0.2)                      | HLA-B*53:01<br>(0.5147)     |                    |                         | 0.08859  |
|    |                                        | 406 | 415 | RYDQANSETF    | HLA-A*23:01(0.25)                     | HLA-B*57:01<br>(0.5648)     |                    | HLA-A*24:02(0.0700)     | -0.12611 |
|    |                                        | 687 | 696 | RYDSRHLLYF    | HLA-A*23:01(0.25)                     | HLA-B*57:01<br>(0.8132)     |                    | HLA-A*24:02(0.1162)     | -0.09933 |
|    |                                        | 539 | 547 | RETGLAMDV     | HLA-B*40:01(0.25)                     | HLA-<br>B*44:03(0.35<br>79) | HLA-B*40:01(0.30)  | HLA-B*40:01<br>(0.2595) | -0.06251 |
|    |                                        | 693 | 702 | LLYFSAEVTF    | HLA-B*15:01(0.25)                     | HLA-B*57:01<br>(0.5246)     |                    | HLA-A*24:02(0.1773)     | 0.14537  |
| 15 | Q9I202,<br>Pyroglutamate<br>porin OpdO | 294 | 303 | YPYIAGSDPY    | HLA-B*35:01(0.1)                      | HLA-B*57:01<br>(0.3763)     |                    |                         | 0.06033  |
|    |                                        | 319 | 327 | RSWQLRYDY     | HLA-A*30:02(0.15)                     | HLA-B*44:03<br>(0.598)      | HLA-A*01:01(0.80)  | HLA-B*58:01(0.2830)     | 0.0031   |
|    |                                        | 255 | 263 | SEDGGFREL     | HLA-B*40:01(0.2)                      | HLA-B*53:01<br>(0.8133)     | HLA-B*39:01(0.30)  | HLA-B*39:01<br>(0.2621) | 0.28668  |
|    |                                        | 36  | 44  | ELRNIFYFNR    | HLA-A*33:01(0.2)                      | HLA-B*44:03                 |                    |                         | 0.21583  |

|  |     |     |            |                   |                         |                    |                         |          |
|--|-----|-----|------------|-------------------|-------------------------|--------------------|-------------------------|----------|
|  |     |     |            |                   | (0.2008)                |                    |                         |          |
|  | 39  | 47  | NFYFNDRFR  | HLA-A*33:01(0.2)  | HLA-B*44:03<br>(0.0497) |                    |                         | 0.24614  |
|  | 184 | 192 | DYQVFSANR  | HLA-A*33:01(0.2)  | HLA-B*53:01<br>(0.2041) |                    |                         | -0.00855 |
|  | 129 | 137 | LLKVGALHF  | HLA-B*15:01(0.2)  | HLA-B*53:01<br>(0.7471) | HLA-B*15:01(0.05)  | HLA-B*15:01(0.0899)     | 0.05091  |
|  | 4   | 12  | TPRLAALL   | HLA-B*07:02(0.2)  | HLA-B*07:02<br>(0.4789) | HLA-B*07:02(0.20)  | HLA-B*07:02(0.0177)     | 0.10711  |
|  | 150 | 158 | LPELFRGAL  | HLA-B*07:02(0.2)  | HLA-B*44:03<br>(0.0961) | HLA-B*07:02 (0.15) | HLA-B*07:02<br>(0.0367) | 0.23552  |
|  | 296 | 305 | YIAGSDPYLV | HLA-A*02:06(0.25) | HLA-B*57:01<br>(0.5659) |                    | HLA-A*02:01(0.3461)     | -0.11274 |
|  | 57  | 65  | EWAQGFLLR  | HLA-A*33:01(0.25) | HLA-B*44:03<br>(0.4547) |                    |                         | 0.0235   |
|  | 391 | 399 | FANDLDENR  | HLA-A*68:01(0.25) | HLA-B*53:01<br>(0.8757) |                    |                         | 0.11102  |
|  | 266 | 275 | RAFGALFSLR | HLA-A*31:01(0.25) | HLA-B*57:01<br>(0.7654) |                    |                         | 0.0635   |

**Supplementary Table ST-4: MHC I epitopes shortlisting on the basis on antigenicity score and toxicity analysis**

| S.No | Protein ID, name                                       | Start     | End                    | Epitope    | Antigenicity | Toxicity  |
|------|--------------------------------------------------------|-----------|------------------------|------------|--------------|-----------|
| 1    | Q9I6G3, Uncharacterized protein                        | 193       | 201                    | VSNPALGAY  | 0.8041       | Non-toxin |
|      |                                                        | 467       | 475                    | LQAAGGPVL  | 0.6741       | Non-toxin |
|      |                                                        | 66        | 74                     | QTSRQDFTW  | 0.7864       | Non-toxin |
|      |                                                        | 542       | 550                    | LEASLGWRL  | 2.0409       | Non-toxin |
| 2    | Q9HVJ4, Probable outer membrane protein                | 134       | 142                    | RTADEAGRY  | 1.0052       | Non-toxin |
|      |                                                        | 119       | 127                    | GEYGRFSL   | 1.1993       | Non-toxin |
| 3    | Q9I0E2, OpdB proline porin                             | 173       | 181                    | IQAGRFTAF  | -0.6029      | Non-toxin |
|      |                                                        | 137       | 146                    | GEMTVETPVF | 1.2555       | Non-toxin |
| 4    | Q9HYK0, Probable outer membrane protein                | 356       | 364                    | LAKVRAYEM  | 0.9886       | Non-toxin |
|      |                                                        | 199       | 207                    | RAAAARRTL  | 0.3949       | Non-toxin |
|      |                                                        | 222       | 230                    | APIERFPAL  | 0.1003       | Non-toxin |
| 5    | Q9HYQ6, Patatin-like protein, PlpD                     | 470       | 478                    | RYFVAPFLF  | 2.1857       | Non-toxin |
|      |                                                        | 476       | 484                    | FLFHEAQNIV | -0.7472      | Non-toxin |
|      |                                                        | 181       | 189                    | LPQAIRASM  | 0.6620       | Non-toxin |
|      |                                                        | 476       | 484                    | FLFHEAQNIV | -0.7472      | Non-toxin |
| 6    | Q9I0W0, Outer membrane protein CzcC                    | 334       | 342                    | LLRLRSEAV  | 1.2646       | Non-toxin |
|      |                                                        | 294       | 302                    | GERVNLIIGL | -0.0870      | Non-toxin |
| 7    | Q9I2I2, Probable TonB-dependent receptor               | 14        | 23                     | RLARAVPFY  | 0.2510       | Non-toxin |
|      |                                                        | 522       | 530                    | LELGGGVDL  | 2.0270       | Non-toxin |
|      |                                                        | 68        | 77                     | RPVRDLQEAL | -0.6198      | Non-toxin |
|      |                                                        | 304       | 312                    | RTYRNRLER  | 0.8934       | Non-toxin |
|      |                                                        | 162       | 170                    | ITRRATDTW  | 0.5994       | Non-toxin |
|      |                                                        | 404       | 412                    | WESSPRLYL  | 0.9843       | Non-toxin |
|      |                                                        | 595       | 603                    | YALPAYSLW  | 0.9154       | Non-toxin |
|      |                                                        | 49        | 57                     | KLRDAPASV  | 0.6993       | Non-toxin |
|      |                                                        | 288       | 296                    | WSLAHNGQW  | -0.8861      | Non-toxin |
|      |                                                        | 8         | Q9I4U9, Probable porin | 325        | 333          | RSWQLRYDY |
| 64   | 72                                                     | YESGYTEGL |                        | 1.5126     | Non-toxin    |           |
| 273  | 281                                                    | ALNALFTYR |                        | 0.6050     | Non-toxin    |           |
| 134  | 142                                                    | MPRLPVVQF |                        | 0.9824     | Non-toxin    |           |
| 308  | 316                                                    | PYLNVFVQI |                        | -0.0193    | Non-toxin    |           |
| 9    | Q9I319, Type III secretion outer membrane protein PscC | 120       | 128                    | RALTAAGIW  | -0.3898      | Non-toxin |
|      |                                                        | 200       | 209                    | IEAPGIASIL | 0.1449       | Non-toxin |
| 10   | Q9I473, Probable tonB-dependent receptor               | 521       | 529                    | LPRRARRMF  | -0.2420      | Non-toxin |
|      |                                                        | 93        | 101                    | TESDHVLVL  | 0.2701       | Non-toxin |
|      |                                                        | 401       | 409                    | TVSYGTAFK  | 0.0149       | Non-toxin |
|      |                                                        | 590       | 598                    | FGADHETAY  | 1.3888       | Non-toxin |
| 11   | Q9I792, Uncharacterized protein                        | 554       | 562                    | IYFRVDAFF  | 0.8002       | Non-toxin |
|      |                                                        | 529       | 537                    | RYFAASVGF  | 0.0201       | Non-toxin |
| 12   | P35818, Type II secretion system protein D             | 49        | 57                     | QEAHWITINL | 1.3769       | Non-toxin |
| 13   | Q9I3A9, Uncharacterized protein                        | 694       | 702                    | LYFSAEVTF  | 0.0854       | Non-toxin |
|      |                                                        | 530       | 538                    | REIGYNGFF  | -0.0372      | Non-toxin |
|      |                                                        | 458       | 466                    | SPRLAVNYL  | 1.2239       | Non-toxin |
|      |                                                        | 619       | 627                    | GSAGWMHDW  | -0.4238      | Non-toxin |
| 14   | Q9I202, Pyroglutamate porin OpdO                       | 319       | 327                    | RSWQLRYDY  | 2.9388       | Non-toxin |
|      |                                                        | 255       | 263                    | SEDGGFREL  | 0.8272       | Non-toxin |
|      |                                                        | 129       | 137                    | LLKVGALHF  | 1.0811       | Non-toxin |
|      |                                                        | 4         | 12                     | TPRLAAALL  | 0.7871       | Non-toxin |
|      |                                                        | 150       | 158                    | LPELFRGAL  | -0.6168      | Non-toxin |

**Supplementary Table ST 5: identification of MHC II epitopes using IEDB server and epitopes toxicity and antigenicity analysis**

| S.No | Name                                                   | Start | End | MHC II epitopes  | IEDB(percentile rank)           | Toxicity  | Antigenicity |
|------|--------------------------------------------------------|-------|-----|------------------|---------------------------------|-----------|--------------|
| 1    | P35818, Type II secretion system protein D             | 240   | 254 | GAQVIADARTNRLII  | HLA-DRB1*03:01(0.09)            | Non-toxin | 0.2029       |
|      |                                                        | 328   | 342 | ADESTNALVLLADPD  | HLA-DQA1*01:02/DQB1*06:02(0.13) | Non-toxin | 0.4299       |
|      |                                                        | 74    | 88  | GETFVVDPRVKGGQVS | HLA-DRB1*11:01(0.19)            | Non-toxin | 0.7776       |
| 2    | Q9HU51, Uncharacterized protein                        | 138   | 152 | LTYYDYINKARLEQL  | HLA-DRB1*11:01(0.16)            | Non-toxin | 0.0311       |
|      |                                                        | 116   | 130 | SGREEYLKLLLNQEH  | HLA-DRB1*04:05(0.26)            | Non-toxin | 0.2650       |
| 3    | Q9I3A9, Uncharacterized protein                        | 104   | 118 | RLQVLIDGRSVYRPG  | HLA-DRB1*03:01(0.03)            | Non-toxin | 0.4651       |
|      |                                                        | 665   | 679 | ALELAGVLRQLDDQ   | HLA-DRB4*01:01(0.13)            | Non-toxin | 0.8109       |
|      |                                                        | 13    | 27  | LLALLFGSKLAAADL  | HLA-DQA1*01:02/DQB1*06:02(0.14) | Non-toxin | 0.4423       |
| 4    | Q9I6G3, Uncharacterized protein                        | 300   | 314 | MRDFSRLTRLVLEQ   | HLA-DRB1*11:01(0.04)            | Non-toxin | -0.7649      |
|      |                                                        | 471   | 485 | GGPVLLDQRLSGDTS  | HLA-DRB1*03:01(0.05)            | Non-toxin | 0.7245       |
|      |                                                        | 33    | 47  | LERLITDYPGRYRGT  | HLA-DRB1*03:01(0.07)            | Non-toxin | 0.0651       |
| 5    | Q9I202, Pyroglutamate porin OpdO                       | 266   | 280 | RAFQALFSLRGAHA   | HLA-DRB1*09:01(0.01)            | Non-toxin | 1.0951       |
|      |                                                        | 182   | 196 | SSDYQVFSANRIGGR  | HLA-DRB1*07:01(0.24)            | Non-toxin | 0.6490       |
| 6    | Q9I4U9, Probable porin                                 | 390   | 404 | RNGTFRSDFGNDIDE  | HLA-DRB3*01:01(0.04)            | Non-toxin | 0.0461       |
|      |                                                        | 58    | 72  | QGFLRLRYESGYTEGL | HLA-DRB1*15:01(0.14)            | Non-toxin | 0.7220       |
| 7    | Q9I2I2, Probable TonB-dependent receptor               | 431   | 445 | KAPSLKQLSPEYAAV  | HLA-DRB1*09:01(0.03)            | Non-toxin | 0.6907       |
|      |                                                        | 10    | 24  | LPPLRLARAVPFLYL  | HLA-DRB3*02:02(0.06)            | Non-toxin | 1.0610       |
|      |                                                        | 536   | 550 | WELNYTYLDARNRTA  | HLA-DRB5*01:01(0.15)            | Non-toxin | 0.9702       |
| 8    | Q9I319, Type III secretion outer membrane protein PscC | 6     | 20  | IGLLALLPGAVLRA   | HLA-DRB1*09:01(0.03)            | Non-toxin | 0.3371       |
|      |                                                        | 246   | 260 | NAVVRDRHKDRPLMY  | HLA-DRB1*03:01(0.07)            | Non-toxin | -0.0549      |
|      |                                                        | 73    | 87  | PQAFRLQMASLYNLG  | HLA-DRB1*01:01(0.14)            | Non-toxin | 0.0204       |
| 9    | Q9I792, Uncharacterized protein                        | 519   | 533 | GNAIELDARGRYFAA  | HLA-DRB1*03:01(0.02)            | Non-toxin | 0.6998       |
| 10   | Q9I0W0, Outer membrane protein CzcC                    |       |     |                  |                                 |           |              |
| 11   | Q9HVJ4, Probable outer membrane protein                | 204   | 218 | DAKYRAGAAALSDRL  | HLA-DRB1*09:01(0.02)            | Non-toxin | 0.7788       |
|      |                                                        | 453   | 467 | TSRLRLAASLGRLGF  | HLA-DRB3*02:02(0.08)            | Non-toxin | 0.1735       |
|      |                                                        | 427   | 441 | MIELNALTAYASAE   | HLA-DQA1*01:02/DQB1*06:02(0.14) | Non-toxin | 0.1514       |
|      |                                                        | 163   | 177 | ATLQNTFALAAQAYY  | HLA-DQA1*01:02/DQB1*06:02(0.16) | Non-toxin | 0.5764       |
|      |                                                        | 453   | 467 | TSRLRLAASLGRLGF  | HLA-DRB5*01:01(0.18)            | Non-toxin | 0.1735       |
| 12   | Q9HYK0, Probable outer membrane protein                | 405   | 419 | AEARYAYLNAWLRLR  | HLA-DRB5*01:01(0.01)            | Non-toxin | 0.7184       |
|      |                                                        | 359   | 373 | VRAYEMAVAAAREQV  | HLA-DRB5*01:01(0.05)            | Non-toxin | 0.3949       |
|      |                                                        | 145   | 159 | REQVVLAEAQRRALE  | HLA-DRB5*01:01(0.12)            | Non-toxin | -0.0875      |
|      |                                                        | 84    | 98  | ERDYRSYASTLSLEQ  | HLA-DRB1*04:01(0.17)            | Non-toxin | 0.5761       |
| 13   | Q9I0E2, OpdB proline porin                             |       |     |                  |                                 |           |              |
| 14   | Q9HYQ6, Patatin-like protein, PlpD                     | 467   | 481 | VGSRYFVAPFLFHEA  | HLA-DPA1*01:03/DPB1*02:01(0.01) | Non-toxin | 0.5079       |
|      |                                                        | 2     | 16  | RRLVLLVLLPLSA    | HLA-DPA1*03:01/DPB1*04:02(0.01) | Non-toxin | 1.6032       |
|      |                                                        | 294   | 308 | IDAGYRATTVLAARL  | HLA-DQA1*01:02/DQB1*06:02(0.02) | Non-toxin | 0.6612       |
|      |                                                        | 687   | 701 | SGYINAASLMIGFDT  | HLA-DQA1*01:02/DQB1*06:02(0.03) | Non-toxin | 0.2508       |
|      |                                                        | 193   | 207 | AVFAPVEIDGRLLVD  | HLA-DRB1*03:01(0.07)            | Non-toxin | 0.3899       |
|      |                                                        | 5     | 19  | LLVLLLLPLSALAA   | HLA-DRB1*01:01(0.14)            | Non-toxin | 1.3696       |
|      |                                                        | 586   | 600 | RQWDLRLNKALSFGA  | HLA-DRB3*02:02(0.16)            | Non-toxin | 1.3838       |
| 15   | Q9I473, Probable tonB-dependent receptor               | 369   | 383 | QLSLRRDDNQFGVH   | HLA-DRB3*01:01(0.01)            | Non-toxin | 0.8807       |
|      |                                                        | 232   | 246 | DNGLELDGTLRAKS   | HLA-DRB1*03:01(0.03)            | Non-toxin | 1.0111       |
|      |                                                        | 212   | 226 | EPDRDGYRNLSGNLR  | HLA-DRB5*01:01(0.14)            | Non-toxin | 0.7545       |

**Supplementary Table ST-6: Characterization of vaccine constructs using different server**

| S.No | Vaccine | AlgPred      | ANTIGENpro | Vaxijen | SOLpro   |
|------|---------|--------------|------------|---------|----------|
| 1    | VT1     | Non-allergen | 0.617893   | 1.5596  | 0.988354 |
| 2    | VT2     | Non-allergen | 0.570354   | 1.5730  | 0.989859 |
| 3    | VT3     | Non-allergen | 0.606306   | 1.7541  | 0.982037 |
| 4    | VT4     | Non-allergen | 0.569399   | 1.5662  | 0.987401 |

**Supplementary Table ST-7: Identification of docking score of HLA alleles and TLR4 complex with all vaccine constructs**

| S.No. | HLA alleles            | VT1    | VT3    | VT4    |
|-------|------------------------|--------|--------|--------|
| 1     | HLA-DRB1*03:01 (1A6A)  | -4.15  | -11.56 | -17.92 |
| 2     | HLA-DRB1*15:01 (1BX2)  | -18.84 | -11.25 | -22.69 |
| 3     | HLA-DRB3*02:02 (3C5J)  | -14.29 | -6.73  | -14.16 |
| 4     | HLA-DRB5*01:01 (1H1S)  | -32.90 | -16.04 | -5.26  |
| 5     | HLA-B*44:03 (1SYS)     | -10.93 | -5.06  | -32.07 |
| 6     | HLA-B*53:01 (1A1M)     | -1.44  | -4.35  | -20.03 |
| 7     | HLA-B*15:01 (1XR8)     | -17.53 | -7.89  | -11.61 |
| 8     | HLA-B*39:01 (4O2E)     | 3.14   | -1.97  | -10.10 |
| 9     | HLA-B*58:01 (5IM7)     | -10.85 | -31.91 | -0.37  |
| 10    | HLA-B*35:01 (1ZSD)     | -2.54  | -1.53  | -10.10 |
| 11    | TLR4/MD2 complex(2Z65) | -7.55  | 4.56   | -6.52  |
| 12    | TLR4/MD2 complex(3FXI) | 0.63   | 2.92   | -11    |

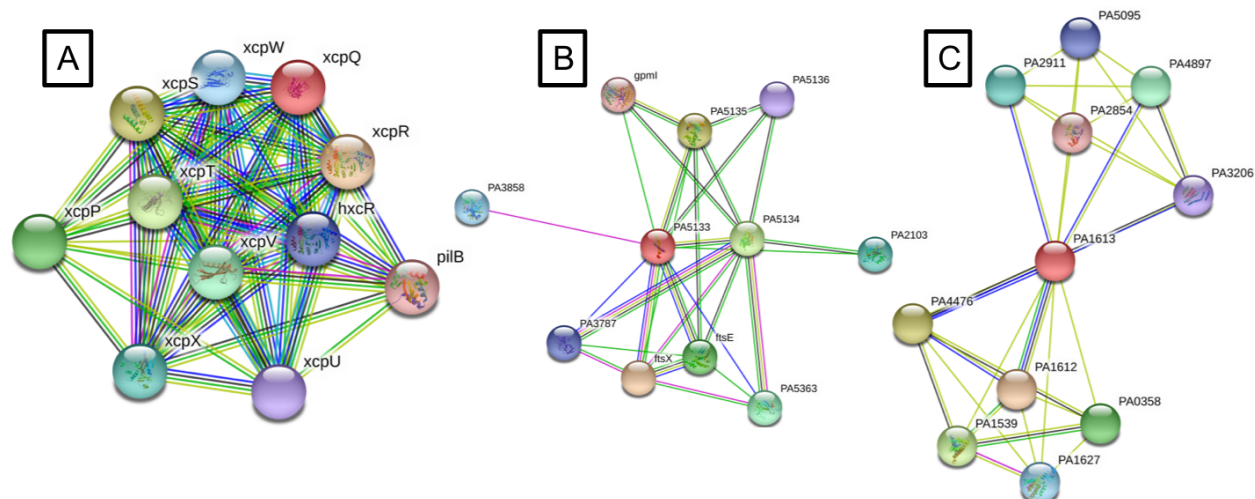

**Supplementary Figure 1** Protein-protein interaction analysis of antigenic proteins using STRING server.

**A)** Protein ID P35818 intra species interacting partners are: xcpR General secretion pathway protein E, xcpS General secretion pathway protein F, xcpT General secretion pathway protein G, xcpP Secretion protein XcpP, xcpV General secretion pathway protein I, xcpX General secretion pathway protein K, xcpW General secretion pathway protein J, hxcR Type II secretion system protein, xcpU General secretion pathway outer membrane protein H, and pilB Type 4 fimbrial biogenesis protein PilB.

**B)** Protein ID Q9HU51, interacting partners are: ftsX Cell division protein FtsX, PA5135 Hypothetical protein, PA5134 Carboxyl-terminal protease, ftsE Cell division protein FtsE, PA5363 Hypothetical protein, PA2103 Molybdopterin biosynthesis protein MoeB, PA3858 Amino acid-binding protein, PA3787 Hypothetical protein, PA5136 Hypothetical protein, and gpmI Phosphoglyceromutase.

**C)** Protein ID Q9I3A9, partners are PA1612 Hypothetical protein, PA4476 Hypothetical protein, PA1539 Hypothetical protein, PA0358 Hypothetical protein, PA4897 Hypothetical protein, PA2911 TonB-dependent receptor, PA1627 Transcriptional regulator, PA5095 ABC transporter permease, PA3206 Two-component sensor, and PA2854 Hypothetical protein.

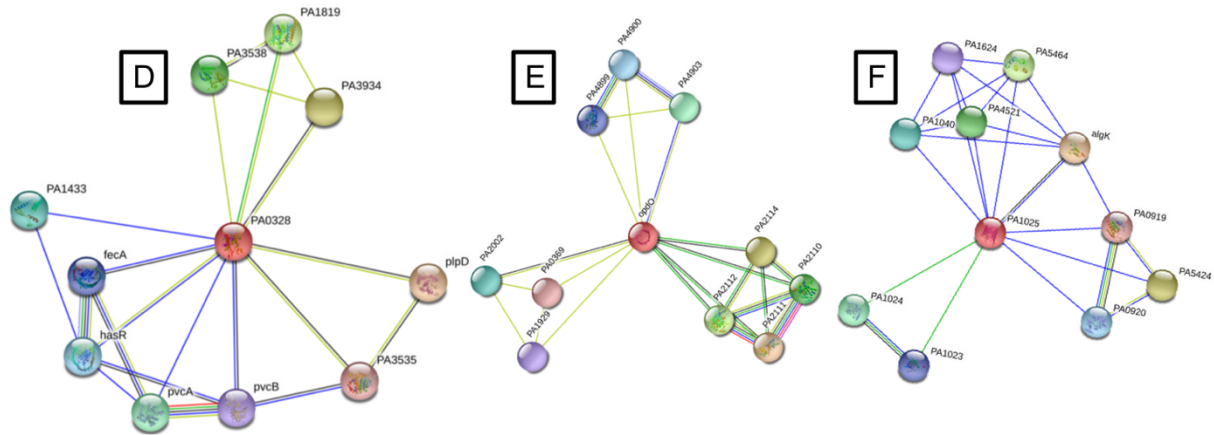

**Supplementary Figure 1** Protein-protein interaction analysis of antigenic proteins using STRING server.

**D)** Protein ID Q9I6G3, intra-species interacting partners are plpD Patatin-like protein, PlpD, PA3934 Hypothetical protein, PA1819 Amino acid permease, PA3538 ABC transporter ATP-binding protein, pvcA Paerucumarin biosynthesis protein PvcA, PA1433 Hypothetical protein, hasR Heme uptake outer membrane receptor HasR, fecA Fe(III) dicitrate transporter FecA, pvcB Paerucumarin biosynthesis protein PvcB, and PA3535 Serine protease.

**E)** Protein ID Q9I202, interacting partners are PA2111 Hypothetical protein, PA2114 Major facilitator superfamily (MFS) transporter, PA2112 LamB/YcsF family protein, PA2110 Hypothetical protein PA4903 Major facilitator superfamily (MFS) transporter, PA2002 Hypothetical protein, PA4900 Major facilitator superfamily (MFS) transporter, PA4899 Aldehyde dehydrogenase, PA1929 Hypothetical protein and PA0369 Hypothetical protein.

**F)** Protein ID Q9I4U9, interacting partners are PA5424 Hypothetical protein, PA5464 Hypothetical protein, PA4521 Hypothetical protein, PA1024 2-nitropropane dioxygenase, PA1040 Hypothetical protein, PA0920 Hypothetical protein, PA1023 Short-chain dehydrogenase, PA1624 Hypothetical protein, and PA0919 Hypothetical protein



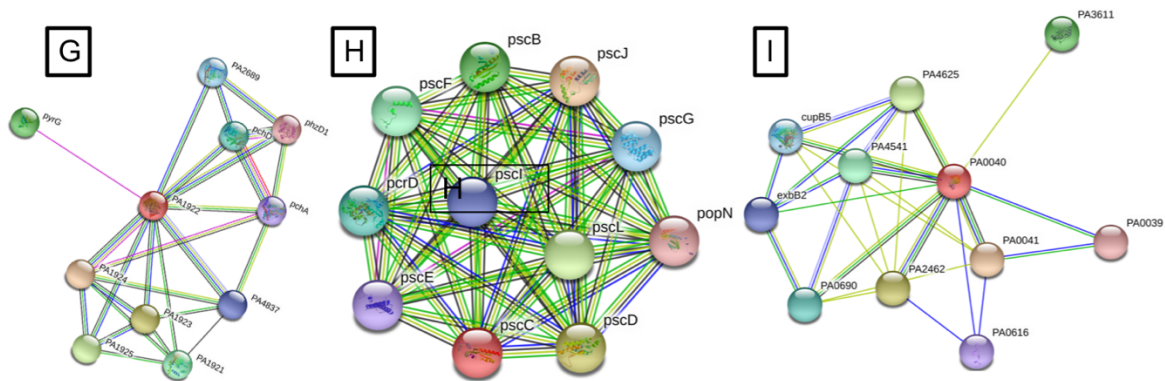

**Supplementary Figure 1** Protein-protein interaction analysis of antigenic proteins using STRING server.

**G)** Protein ID Q9I2I2, interacting partners are PA1924 Hypothetical protein, PA1923 Cobaltochelatae subunit CobN, PA1925 Hypothetical protein, pyrG CTP, PA1921 Hypothetical protein, pchD Pyochelin biosynthesis protein PchD, PA2689 Hypothetical protein, PA4837 Hypothetical protein, pchA Salicylate biosynthesis isochorismate synthase and phzD1 Phenazine biosynthesis protein PhzD.

**H)** Protein ID Q9I319, interacting partners are pscJ Type III export protein PscJ, pscD Type III export protein PscD, pscL Type III secretion system protein, pscB Type III export apparatus protein, pscF Type III export protein PscF, pcrD Type III secretory apparatus protein PcrD, pscG Type III export protein PscG, pscI, Type III export protein PscI, pscE Type III export protein PscE, and popN Type III secretion outer membrane protein PopN.

**I)** Protein ID Q9I792 interacting partners PA0041 Hemagglutinin, PA2462 Hypothetical protein, PA4625 Hypothetical protein, PA3611 Hypothetical protein, PA4541 Hypothetical protein, PA0690 Hypothetical protein, cupB5 Adhesive protein CupB5, exbB2 Transporter ExbB2, PA0616 Hypothetical protein, and PA0039 Hypothetical protein.

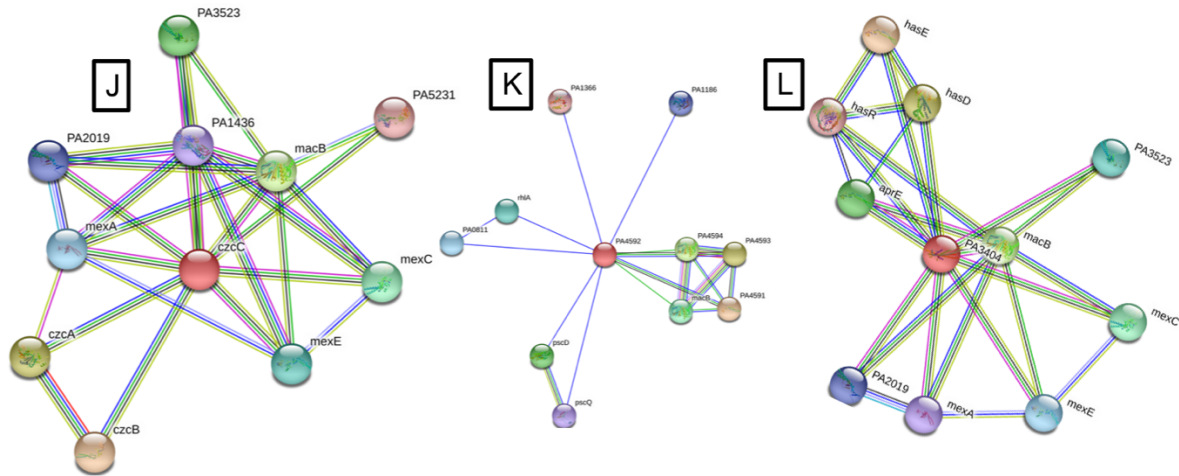

**Supplementary Figure 1** Protein-protein interaction analysis of antigenic proteins using STRING server. **J)** Protein ID Q9I0W0 interacting partners are CzcB Resistance-nodulation-cell division (RND) divalent metal cation efflux membrane fusion protein CzcB, CzcA Resistance-Nodulation-cell Division (RND) divalent metal cation efflux transporter CzcA, MacB Protein PvdT, PA3523 Resistance-Nodulation-cell Division (RND) efflux membrane fusion protein, MexC Resistance-nodulation-cell division (RND) multidrug efflux membrane fusion protein MexC , MexE Resistance-nodulation-cell division (RND) multidrug efflux membrane fusion protein, MexE (mexA Resistance-nodulation-cell division (RND) multidrug efflux membrane fusion protein, MexA, PA2019 Periplasmic multidrug efflux lipoprotein, PA1436 Resistance-Nodulation-cell Division (RND) efflux transporter, and PA5231 ABC transporter ATP-binding protein/permease.

**K)** protein ID Q9HVJ4, interacting partners are PA4591 Hypothetical protein, PA4593 ABC transporter permease, PA4594 ABC transporter ATP-binding protein, pscD Type III export protein PscD, macB Protein PvdT, rhlA Rhamnosyltransferase chain A; Required for rhamnolipid surfactant production, PA0811 Major facilitator superfamily (MFS) transporter, PA1186 Hypothetical protein, pscQ Type III secretion system protein, and PA1366 Hypothetical protein.

**L)** protein ID Q9HYK0 interacting partners are hasE Metalloprotease secretion protein, hasD Transporter HasD, macB Protein PvdT, aprE Alkaline protease secretion protein AprE, mexC Resistance-nodulation-cell division (RND) multidrug efflux membrane fusion protein MexC, PA3523 Resistance-Nodulation-cell Division (RND) efflux membrane fusion protein, mexE Resistance-nodulation-cell division (RND) multidrug efflux membrane fusion protein MexE, PA2019 Periplasmic multidrug efflux lipoprotein, mexA Resistance-nodulation-cell division (RND) multidrug efflux membrane fusion protein MexA, hasR Heme uptake outer membrane receptor HasR.

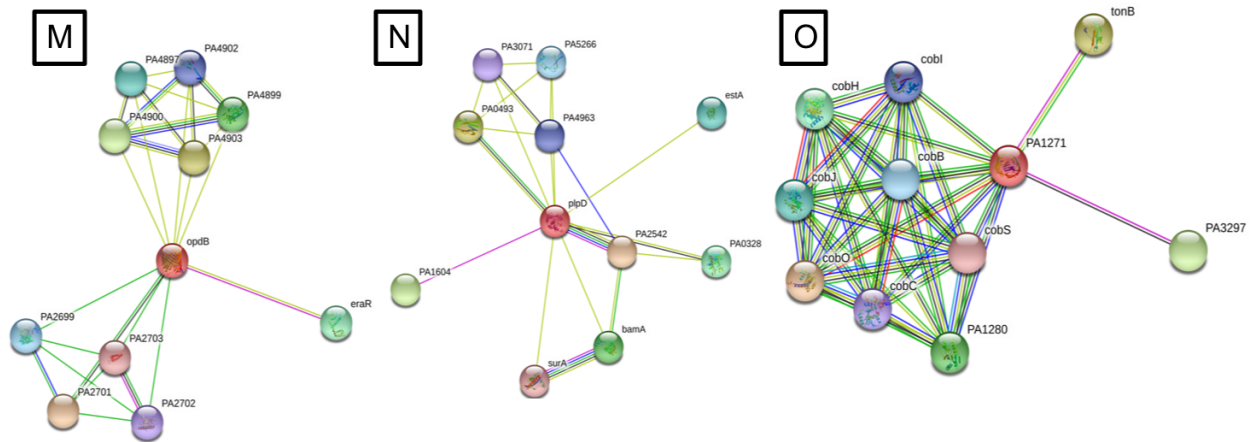

**Supplementary Figure 1** Protein-protein interaction analysis of antigenic proteins using STRING server.

**M)** Protein ID Q9I0E2, interacting partners are PA2701 Major facilitator superfamily (MFS) transporter, PA4903 Major facilitator superfamily (MFS) transporter, PA4900 Major facilitator superfamily (MFS) transporter, PA4899 Aldehyde dehydrogenase, eraR Response regulator EraR, PA4897 Hypothetical protein, PA2699 Hypothetical protein, PA4902 Transcriptional regulator, PA2702 Hypothetical protein, and PA2703 Hypothetical protein

**N)** Protein ID Q9HYQ6 interacting partners are PA2542 Hypothetical protein PA0493 Hypothetical protein, PA1604 Hypothetical protein, bamA Outer membrane protein Opr86, PA0328 Hypothetical protein, estA Esterase, PA5266 Hypothetical protein, PA4963 Hypothetical protein, PA3071 Hypothetical protein, and surA Peptidyl-prolyl cis-trans isomerase SurA

**O)** Protein ID Q9I473 interacting partners are cobO cob(I)yrinic acid a,c-diamide adenosyltransferase, tonB Protein TonB1, PA3297 ATP-dependent helicase, PA1280 Hypothetical protein, cobH precorrin-8X methylmutase, cobJ Precorrin-3 methylase CobJ, cobB Cobyrinic acid a,c-diamide synthase, cobI Precorrin-2 C(20)-methyltransferase, cobC Threonine-phosphate decarboxylase, and cobS Cobalamin synthase.

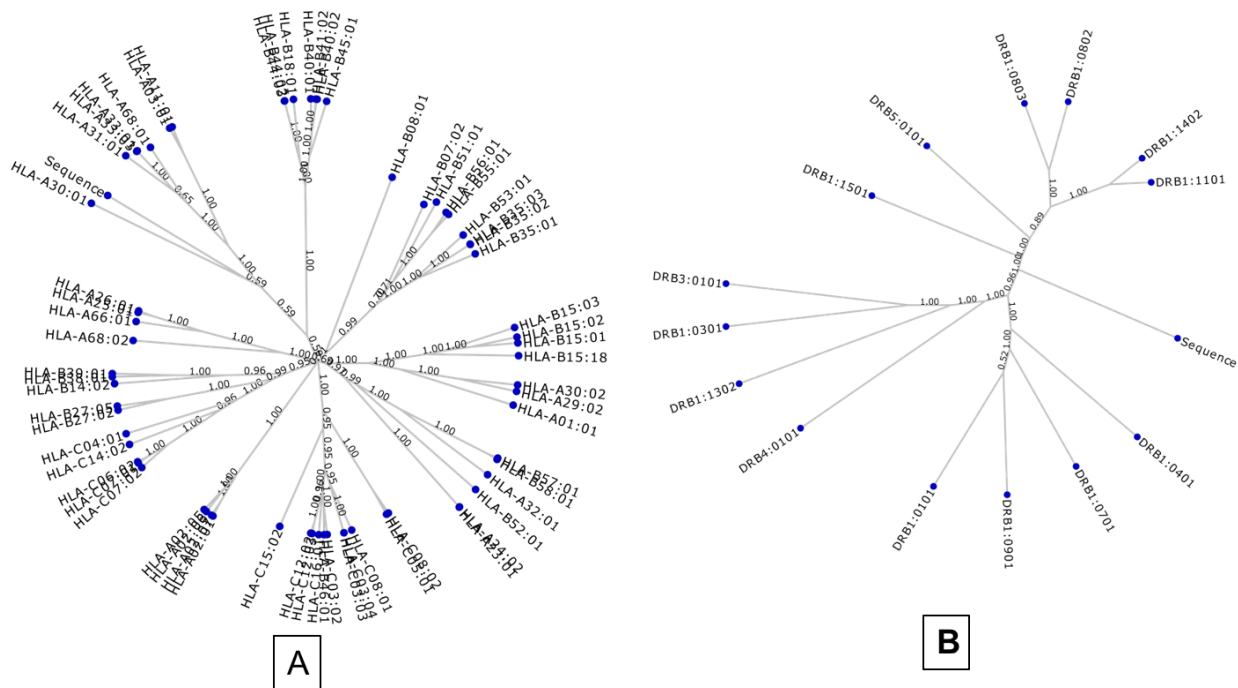

**Supplementary Figure SF 2:** Cluster analysis of the HLA alleles for both MHC molecules through tree map representation. **(A)** Representing the cluster of the MHC-I. **(B)** Representing the cluster of MHC-II molecules.
